# Supplementary material for: Genomic Tools for the Conservation and Genetic Improvement of a Highly Fragmented Breed—The Ramo Grande Cattle from the Azores
Source: PubMed Central journal article supplement (PMC7341246; doi:10.3390/ani10061089), 2020-06-24
Supplement: animals-10-01089-s001.pdf [file animals-10-01089-s001.pdf]

S1 Table- Number of ROH segments per chromosome.

| <b>Chromosome</b>  | <b>Total Count of ROH Segments</b> |
|--------------------|------------------------------------|
| 1                  | 30                                 |
| 2                  | 22                                 |
| 3                  | 26                                 |
| 4                  | 33                                 |
| 5                  | 33                                 |
| 6                  | 39                                 |
| 7                  | 26                                 |
| 8                  | 30                                 |
| 9                  | 21                                 |
| 10                 | 25                                 |
| 11                 | 30                                 |
| 12                 | 23                                 |
| 13                 | 19                                 |
| 14                 | 25                                 |
| 15                 | 24                                 |
| 16                 | 19                                 |
| 17                 | 19                                 |
| 18                 | 22                                 |
| 19                 | 20                                 |
| 20                 | 12                                 |
| 21                 | 18                                 |
| 22                 | 22                                 |
| 23                 | 12                                 |
| 24                 | 13                                 |
| 25                 | 13                                 |
| 26                 | 28                                 |
| 27                 | 10                                 |
| 28                 | 13                                 |
| 29                 | 12                                 |
| <b>Grand Total</b> | <b>639</b>                         |

**S2 Table – Summary statistics of ROH length (Mbps) per chromosome.**

| <b>Chromosome</b> |    | <b>Mean</b> | <b>Min</b> | <b>Max</b> | <b>Stdev</b> |
|-------------------|----|-------------|------------|------------|--------------|
|                   | 1  | 15,58769547 | 4,139583   | 52,837796  | 12,53992319  |
|                   | 2  | 11,49754395 | 4,184694   | 28,552765  | 6,850616767  |
|                   | 3  | 16,10925592 | 4,144932   | 78,304324  | 17,36421542  |
|                   | 4  | 17,07648576 | 4,043861   | 67,871682  | 14,80494059  |
|                   | 5  | 18,4749803  | 5,283996   | 54,843229  | 12,08825233  |
|                   | 6  | 18,15638618 | 4,377729   | 51,374175  | 13,23605148  |
|                   | 7  | 15,87126081 | 4,341681   | 51,698911  | 13,02790834  |
|                   | 8  | 22,40710187 | 4,291997   | 53,172577  | 13,99734296  |
|                   | 9  | 12,9276191  | 4,822196   | 37,491164  | 9,052265869  |
|                   | 10 | 12,93534056 | 4,142529   | 40,169058  | 9,097745465  |
|                   | 11 | 17,3013354  | 4,210089   | 58,507927  | 13,51843766  |
|                   | 12 | 13,2998557  | 4,032933   | 70,143409  | 16,12082354  |
|                   | 13 | 15,88417816 | 4,09097    | 60,619246  | 16,64171289  |
|                   | 14 | 14,64778696 | 4,280308   | 48,397142  | 10,74701343  |
|                   | 15 | 12,44985363 | 5,070148   | 51,668992  | 10,53061347  |
|                   | 16 | 13,30724321 | 4,213137   | 36,679059  | 8,491541351  |
|                   | 17 | 16,98839295 | 5,911399   | 49,134195  | 12,07306859  |
|                   | 18 | 14,34071791 | 5,378589   | 57,368842  | 11,69819217  |
|                   | 19 | 12,5913727  | 4,187886   | 25,424659  | 6,633825869  |
|                   | 20 | 11,54404775 | 4,181933   | 50,946867  | 12,71363581  |
|                   | 21 | 10,4362505  | 4,087774   | 39,968973  | 8,301042487  |
|                   | 22 | 14,05612723 | 6,03456    | 46,589201  | 9,5354507    |
|                   | 23 | 10,27638058 | 4,006504   | 34,214953  | 8,790677744  |
|                   | 24 | 14,94435985 | 4,27848    | 51,937833  | 12,68065137  |
|                   | 25 | 8,834092077 | 4,047632   | 17,689957  | 4,497647401  |
|                   | 26 | 15,92426921 | 4,650936   | 37,439951  | 8,417221642  |
|                   | 27 | 10,6097734  | 4,300144   | 27,540875  | 7,88553509   |
|                   | 28 | 9,504696692 | 4,256419   | 24,943762  | 6,476384667  |
|                   | 29 | 15,42706475 | 5,132827   | 35,292474  | 10,96665025  |
